# Supplementary material for: Insight into the PEC and interfacial charge transfer kinetics at the Mo doped BiVO4photoanodes
Source: Royal Society of Chemistry journal article supplement (doi:10.1039/c9ra08743e), 2019-01-01
Supplement: c9ra08743e1.pdf [file c9ra08743e1.pdf]

**Supporting Information**

**Insight into the PEC and Interfacial Charge Transfer Kinetics at the  
Mo Doped BiVO<sub>4</sub> Photoanodes**

Sriram Kumar<sup>1</sup>, Satyaprakash Ahirwar<sup>2</sup> and Ashis Kumar Satpati<sup>1\*</sup>

<sup>1</sup>Analytical Chemistry Division, Bhabha Atomic Research Centre, Trombay, Mumbai 400085,  
India

<sup>1</sup>Homi Bhabha National Institute, Anushaktinagar, Mumbai 400094, India

<sup>2</sup>Indian Institute of Technology, Bombay, Mumbai, India

\*Corresponding author: email [asatpati@barc.gov.in](mailto:asatpati@barc.gov.in)

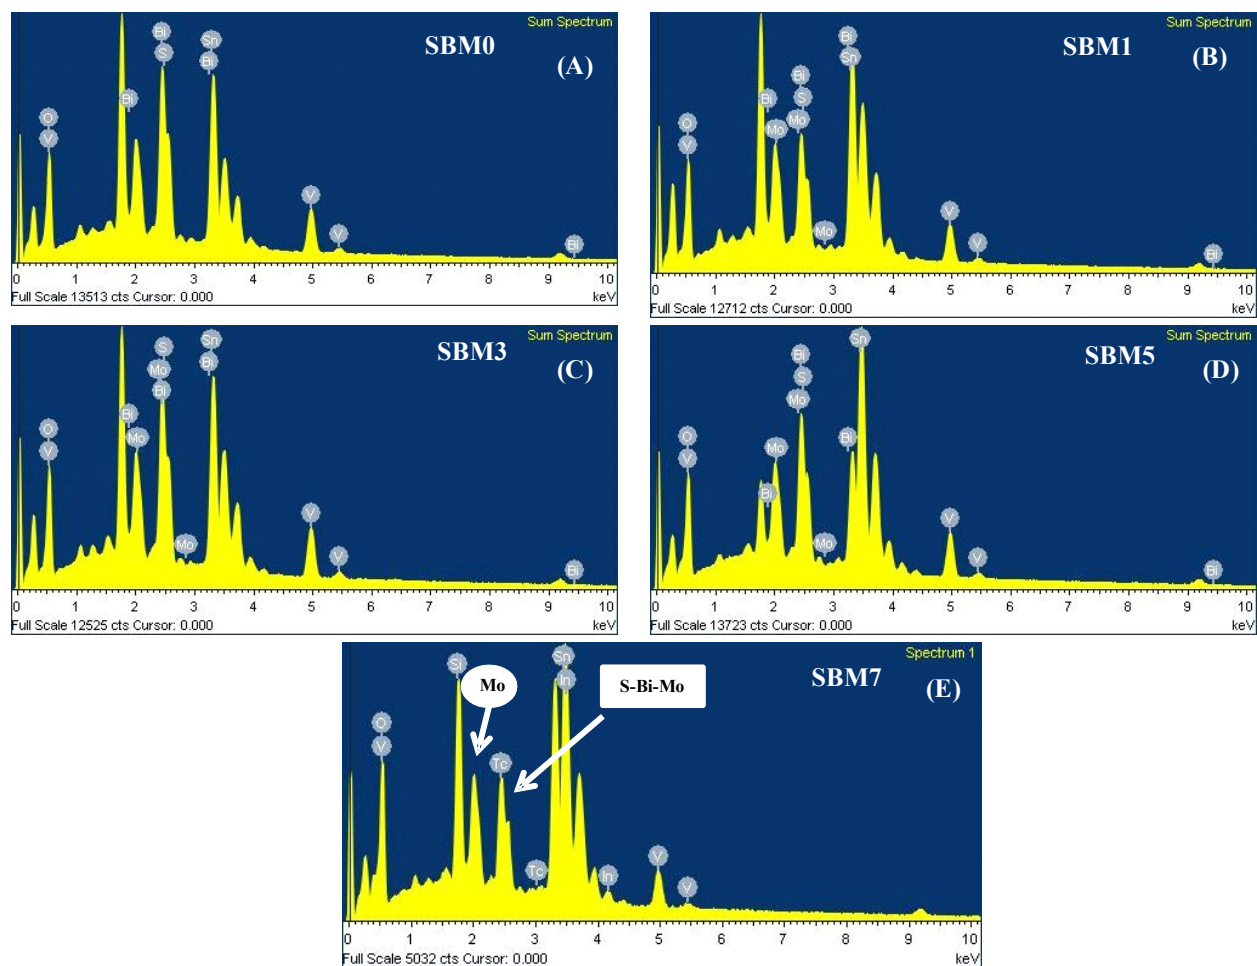

**Fig. S1.** EDS analysis of different catalysts for calculation of Bi, V, O and Mo in the photoanodes (A) SBM0, (B) SBM1, (C) SBM3, (D) SBM5 and (E) SBM7.

**Table S1.** Elemental analysis of Bi, V, O, Mo and Sn in  $\text{BiVO}_4$  photoanodes.

| Elements    | SBM0     | SBM1     | SBM3     | SBM5     | SBM7     |
|-------------|----------|----------|----------|----------|----------|
|             | Atomic % | Atomic % | Atomic % | Atomic % | Atomic % |
| <b>Bi M</b> | 11.20    | 10.51    | 11.14    | 11.34    | 10.47    |
| <b>V K</b>  | 11.45    | 9.54     | 9.24     | 8.39     | 7.34     |

|             |       |       |       |       |       |
|-------------|-------|-------|-------|-------|-------|
| <b>O K</b>  | 72.06 | 71.31 | 69.63 | 64.49 | 66.02 |
| <b>Mo L</b> | -     | 0.78  | 3.18  | 4.43  | 6.37  |
| <b>Sn L</b> | 5.10  | 6.53  | 5.57  | 5.90  | 9.80  |

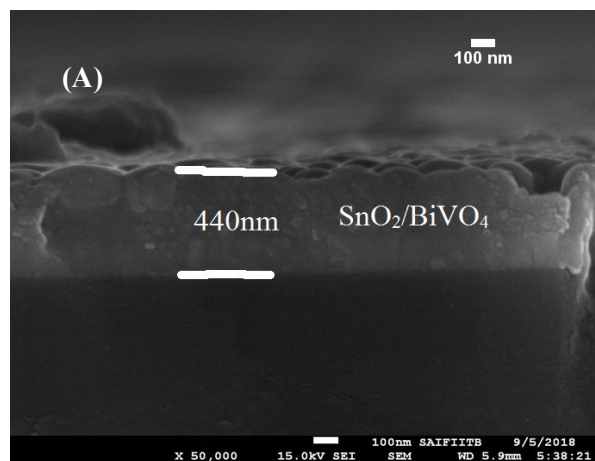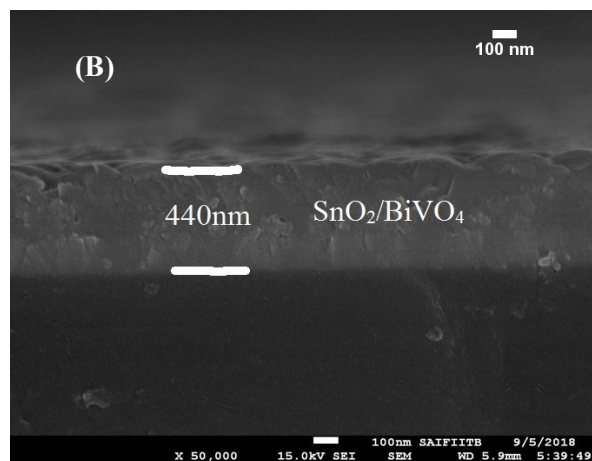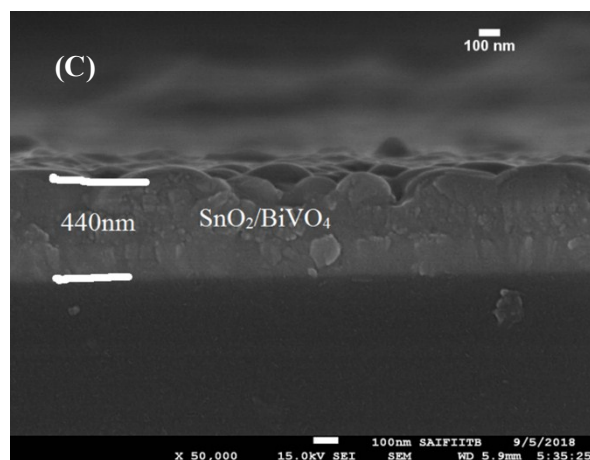

**Fig. S2.** Cross-sectional view of photoanodes for thickness measurements (A) SBM0, (B) SBM3 and (C) SBM7. Total thickness of film is 440nm

Table S2. The comparative study of the performance of BiVO<sub>4</sub> based photoanodes.

| Photoanodes                                       | j at 1.23 V vs. RHE (mAcm <sup>-2</sup> ) without co-catalyst | j at 1.23 V vs. RHE (mAcm <sup>-2</sup> ) With co-catalyst | Buffer/pH                                        | Year | Reference                   |
|---------------------------------------------------|---------------------------------------------------------------|------------------------------------------------------------|--------------------------------------------------|------|-----------------------------|
| Mo:BiVO <sub>4</sub>                              | 2.16                                                          | na                                                         | Natural sea water. pH = 6                        | 2011 | Luo et al. <sup>1</sup>     |
| Mo:BiVO <sub>4</sub> /CoPi                        | 0.2                                                           | 1.0                                                        | 0.5 M Na <sub>2</sub> SO <sub>4</sub> , pH = 7   | 2011 | Pilli et al. <sup>2</sup>   |
| W:BiVO <sub>4</sub> /CoPi                         | 1.1                                                           | 3                                                          | 0.1 M PBS, pH = 7.3                              | 2013 | Abdi et al. <sup>3</sup>    |
| BiVO <sub>4</sub> /FeOOH/NiOOH                    | 1.9                                                           | 4.5                                                        | 0.5 M PBS, pH = 7                                | 2014 | Kim et al. <sup>4</sup>     |
| Mo:BiVO <sub>4</sub> /FeOH                        | 1.1                                                           | 3.0                                                        | 0.1 M PBS, pH = 7                                | 2014 | Park et al. <sup>5</sup>    |
| H <sub>2</sub> treated Mo:BiVO <sub>4</sub> /CoPi | 2.5                                                           | 4.9                                                        | 0.1 M PBS, pH = 7                                | 2015 | Kim et al. <sup>6</sup>     |
| N <sub>2</sub> treated BiVO <sub>4</sub> /FeOOH   | 2.90                                                          | 5.20                                                       | 0.5 M PBS, pH = 7.2                              | 2015 | Kim et al. <sup>7</sup>     |
| BiVO <sub>4</sub> /CoO <sub>x</sub> /NiO          | 1.1                                                           | 3.5                                                        | 0.1 M PBS, pH = 7                                | 2015 | Zhong et al. <sup>8</sup>   |
| Mo:BiVO <sub>4</sub>                              | 1.9                                                           | na                                                         | 0.1M PBS, pH = 7.3                               | 2017 | Rohloff et al. <sup>9</sup> |
| ZnO/BiVO <sub>4</sub> /CoPi                       | 0.28                                                          | 2.45                                                       | 0.3 M Na <sub>2</sub> SO <sub>4</sub> , pH = 7.5 | 2017 | Yang et al. <sup>10</sup>   |
| Mo:BiVO <sub>4</sub>                              | 2.1                                                           | na                                                         | 0.1 M Na <sub>2</sub> SO <sub>3</sub>            | 2018 | Huang et al. <sup>11</sup>  |

|                                                   |                                                             |      |                        |      |                              |
|---------------------------------------------------|-------------------------------------------------------------|------|------------------------|------|------------------------------|
| SnO <sub>2</sub> /BiVO <sub>4</sub>               | 2.62                                                        | na   | 0.5 M PBS,<br>pH = 7.  | 2018 | Byun et al. <sup>12</sup>    |
| Fluorinated<br>Mo:BiVO <sub>4</sub> /CoPi         | 1.45                                                        | 5.43 | 0.1 M PBS,<br>pH = 7.2 | 2019 | Rohloff et al. <sup>13</sup> |
| BiVO <sub>4</sub> /Fe-<br>phenolic layer<br>(FTA) | 1.5                                                         | 5.50 | 0.5 M BBS,<br>pH = 9   | 2020 | Cao et al. <sup>14</sup>     |
| Mo:BiVO <sub>4</sub>                              | 1.50<br>3.46 (in 0.1<br>M Na <sub>2</sub> SO <sub>3</sub> ) | na   | 0.1 M PBS,<br>pH = 7   |      | <b>This work</b>             |

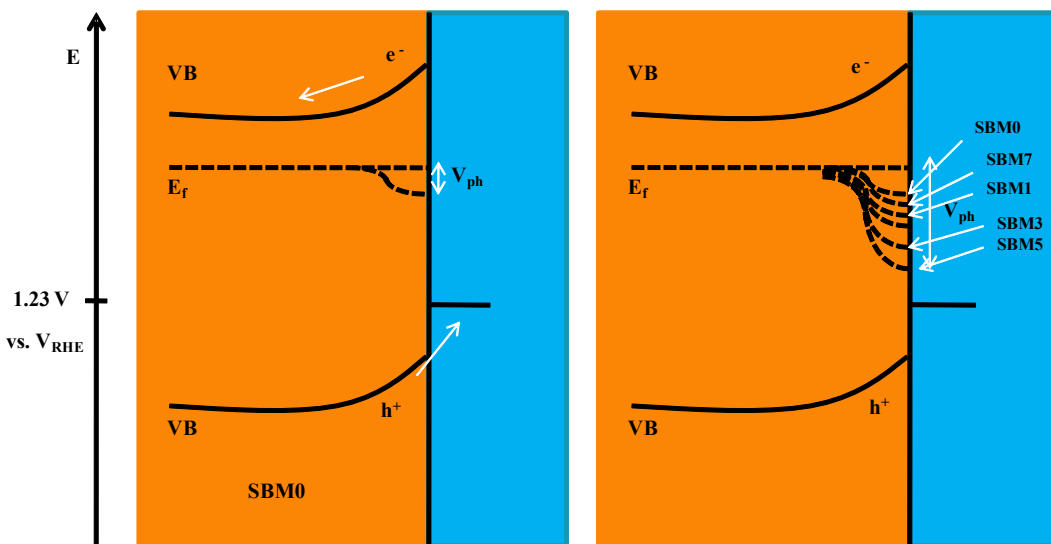

Fig. S3. Band diagram of BiVO<sub>4</sub> and Mo doped BiVO<sub>4</sub>. The band diagram is constructed using UV-vis spectroscopy, OCPV and flat band potential measurements (not o scale).

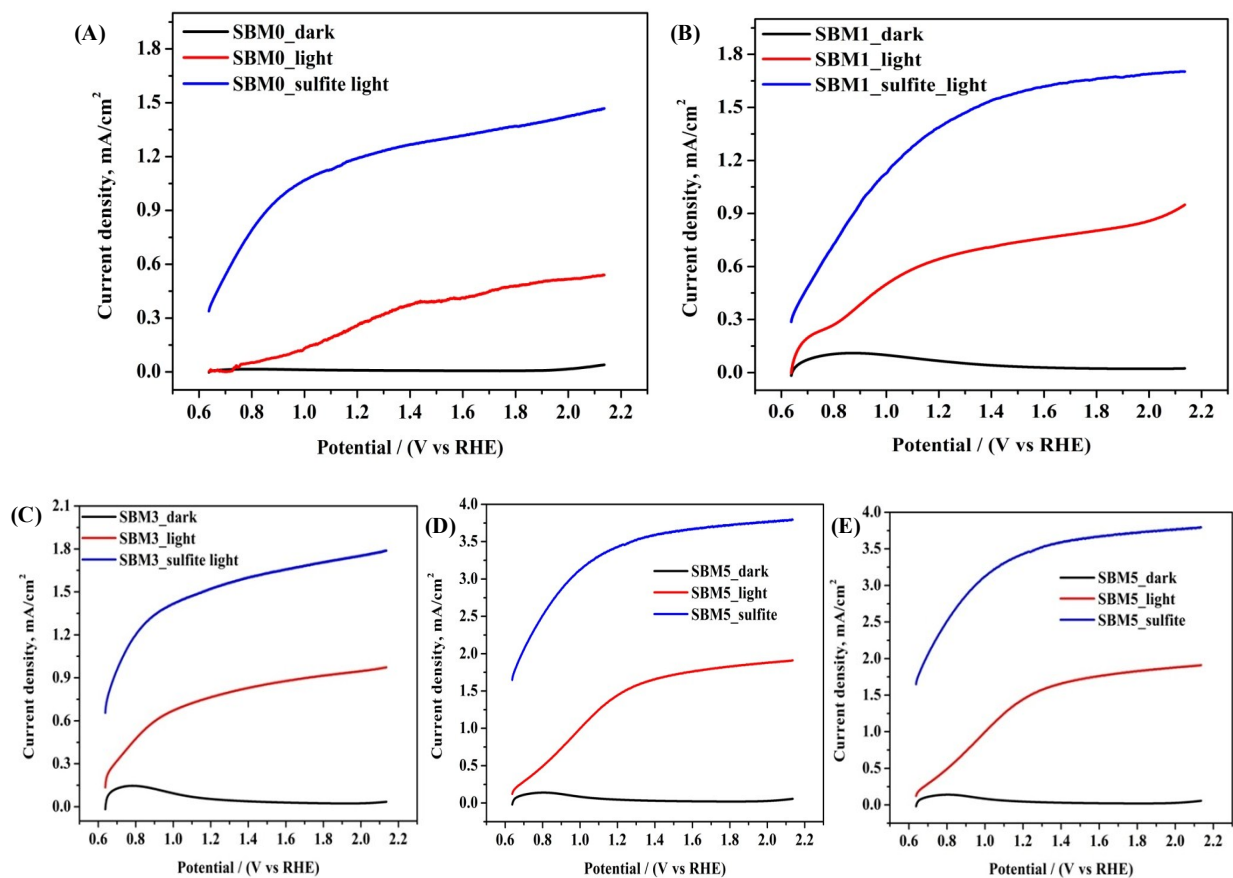

**Fig. S4.** LSV of photoanodes (A) SBM0, (B) SBM1, (C) SBM3, (D) SBM5 and (E) SBM7 in 0.5M Na<sub>2</sub>SO<sub>4</sub> in 0.1M PBS for PEC water oxidation reaction and 0.1M Na<sub>2</sub>SO<sub>3</sub> as hole scavenger for charge transfer kinetics measurement.

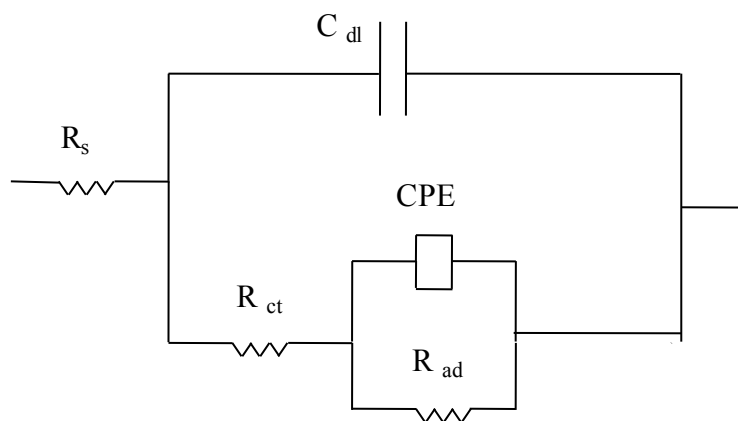

**Fig. S5.** The equivalent electrical circuit used for fitting the impedance spectroscopy data.

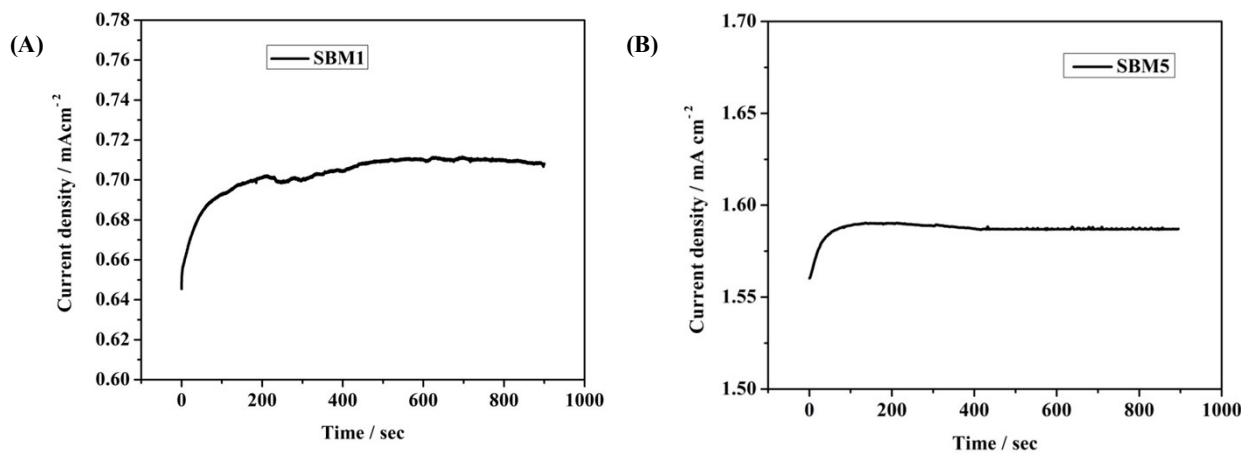

**Fig. S6.** Stability test of (A) SBM1 and (B) SBM5 in 0.5M Na<sub>2</sub>SO<sub>4</sub> in 0.1M PBS at 1.44V.

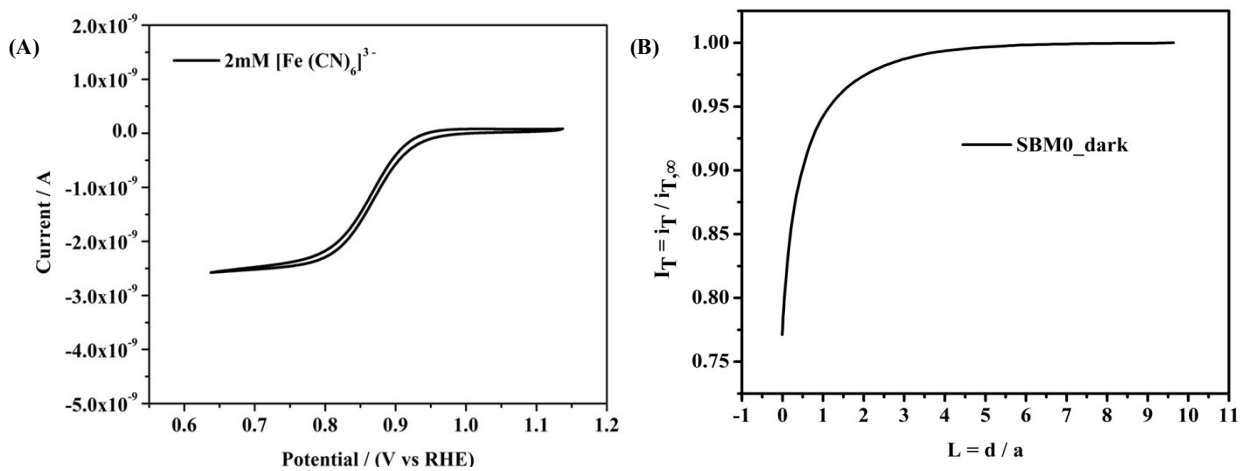

**Fig. S7.** (A) CV of Pt ultra-microelectrode (UME) in 2mM [Fe(CN)<sub>6</sub>]<sup>3-</sup> at 10mVs<sup>-1</sup> scan rate and (B) probe approach curve (PAC) of Pt UME in 2mM [Fe(CN)<sub>6</sub>]<sup>3-</sup> solution at SBM0 photoanode in dark.

The normalized approach curves are fitted by using these equations 1-6.<sup>15</sup>

$$I_T^{ins}(L, RG) = \frac{\frac{2.08}{RG^{0.358}}\left(L - \frac{0.145}{RG}\right) + 1.585}{\frac{2.08}{RG^{0.358}}(L + 0.0023RG) + 1.57 + \frac{LnRG}{L} + \frac{2}{\pi RG}Ln\left(1 + \frac{\pi RG}{2L}\right)} \quad (1)$$

$$I_T^{cond}(L + \kappa^{-1}, RG) = \alpha(RG) + \frac{\pi}{4\beta(RG)\arctan(L + \kappa^{-1})} + \left(1 - \alpha(RG) - \frac{1}{2\beta(RG)}\right)\frac{2}{\pi}\arctan(L + \kappa^{-1}) \quad (2)$$

$$I_T(L, \kappa, RG) = I_T^{cond}\left(L + \frac{1}{\kappa}, RG\right) + \frac{I_T^{ins}(L, RG) - 1}{(1 + 2.47RG^{0.31}L\kappa)(1 + L^{0.006RG + 0.113}\kappa^{-0.023RG + 0.91})} \quad (3)$$

$$I_T = I_s\left(1 - \frac{I_T^{ins}}{I_T^{cond}}\right) + I_T^{ins} \quad (4)$$

$$\alpha(RG) = Ln2 + Ln2\left(1 - \frac{2}{\pi}\arccos\left(\frac{1}{RG}\right)\right) - Ln2\left(1 - \left(\frac{2}{\pi}\arccos\left(\frac{1}{RG}\right)\right)^2\right) \quad (5)$$

$$\beta(RG) = 1 + 0.639\left(1 - \frac{2}{\pi}\arccos\left(\frac{1}{RG}\right)\right) - 0.186\left(1 - \left(\frac{2}{\pi}\arccos\left(\frac{1}{RG}\right)\right)^2\right) \quad (6)$$

Where  $RG = r_{\text{glass}}/r_T$  is the ratio of the radius of glass sheath ( $r_{\text{glass}}$ ) to the radius of the active area of Pt UME ( $r_T$ ),  $I_T^{cond}$  is diffusion control current for conducting substrate i.e. positive feedback,  $I_T^{ins}$  is diffusion control current for insulating substrate i.e. negative feedback.

The details reaction mechanism of PEC regeneration has been developed under the steady-state SECM using  $[\text{Fe}(\text{CN})_6]^{4-} / [\text{Fe}(\text{CN})_6]^{3-}$  redox probe on the photoanode<sup>16, 17</sup>.

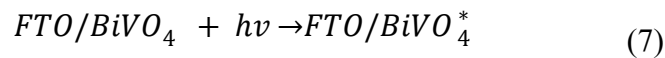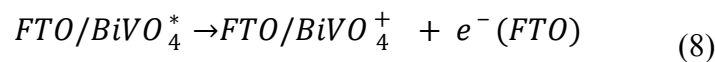



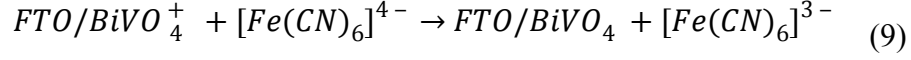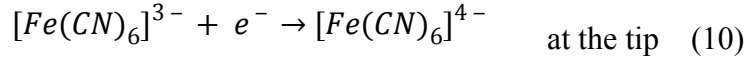

On solving the above equations using steady-state approximation, the following result has been obtained as

$$\frac{1}{I_s} = \frac{1}{I_{T, cond}} + \frac{4D_{diffusion}[Fe^{3+}]^*}{\pi r_T l [BiVO_4] \phi_{hv} J_{hv}} + \frac{4D_{diffusion}}{\pi r_T l [BiVO_4] k_{ox}} \quad (11)$$

For the first-order reaction at the  $BiVO_4$  electrode surface, the following expression is in correlation with the feedback approach curve<sup>18, 19</sup>.

$$\frac{1}{I_s} = \frac{1}{I_{T, cond}} + \frac{1}{\pi \kappa} \quad (12)$$

$$k_{eff} = \kappa \frac{D_{diffusion}}{r_T} \quad (13)$$

Experimental normalized probe approach curves are fitted using equations 1-6 at different  $\kappa$  and interfacial effective rate constant ( $k_{eff}$ ) is calculated using equation 13. The mapping of  $BiVO_4$  photoanodes was performed by measuring tip current in feedback mode at constant height to quantify the localized surface catalytic activity in PEC.

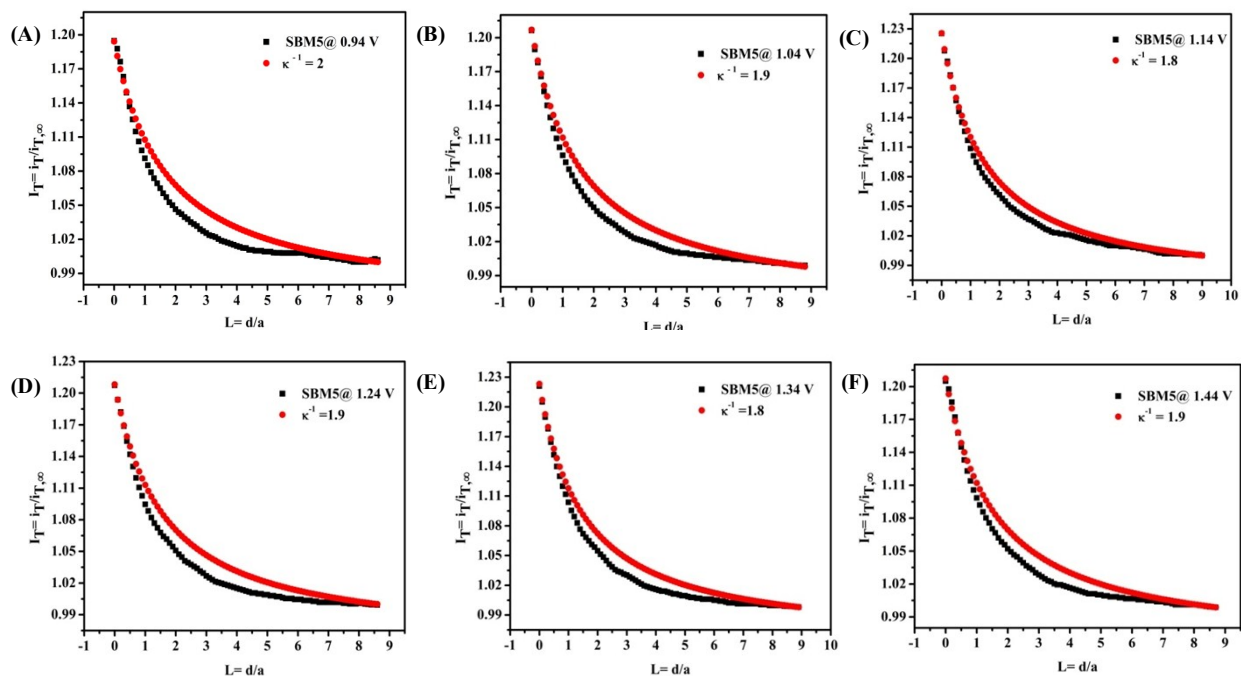

**Fig. S8.** Normalized SECM feedback approach curve of the SBM5 at (A) 0.94V, (B)1.04V, (C) 1.14V, (D) 1.24V, (E) 1.34V and (F) 1.44V in 2mM  $[\text{Fe}(\text{CN})_6]^{3-}$  solution at different applied potential at substrate under illumination using Pt ultra-microelectrode having  $r_T$  value  $4.8\mu\text{m}$  as calculated from the cyclic voltammery measurement shown in Supporting Information Fig. S5. The feedback approach curve are fitted with a theoretical model of SECM using equations 8-13 given in the manuscript.

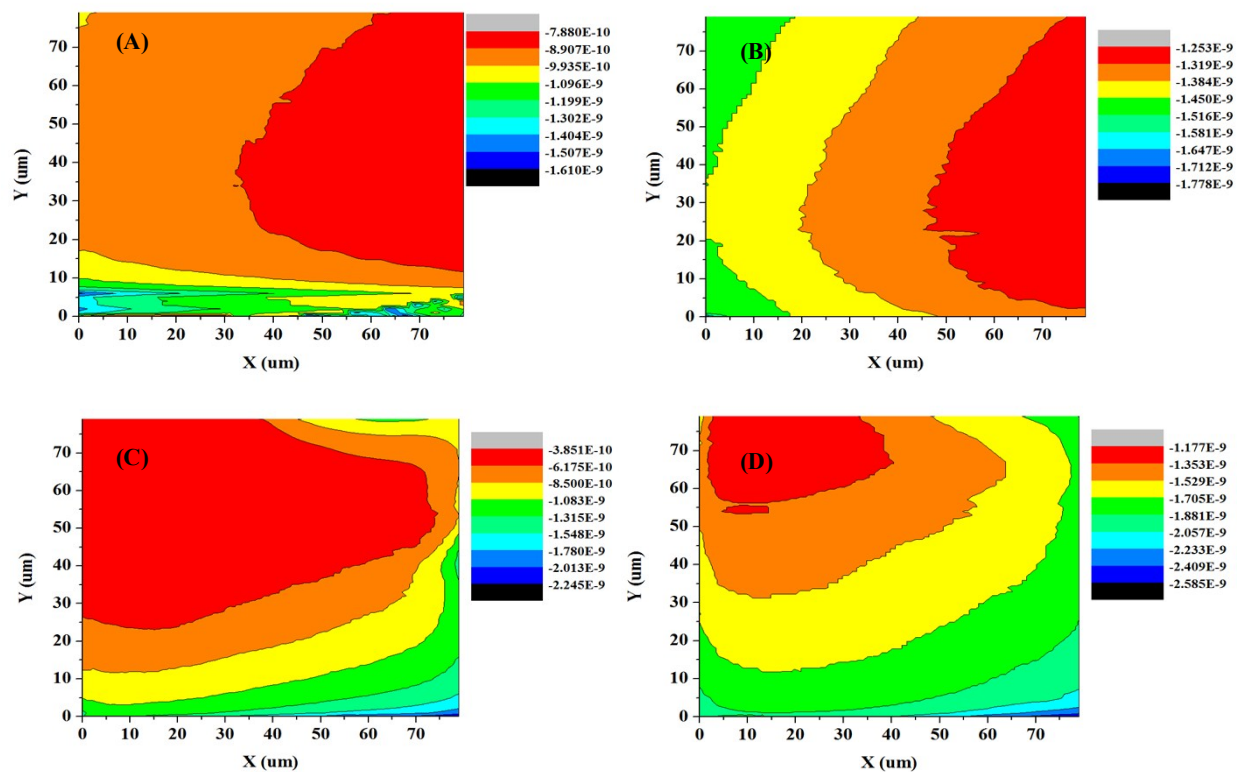

**Fig. S9.** Scanning electrochemical microscopy (SECM) imaging of photoanodes SBM0 at (A) 0.94V and (B) 1.14V and SBM1 at (C) 0.94V and (D) 1.14V substrate potential in 2mM  $[\text{Fe}(\text{CN})_6]^{3-}$  at constant height mode using Pt UME as probe and photoanodes as substrate.

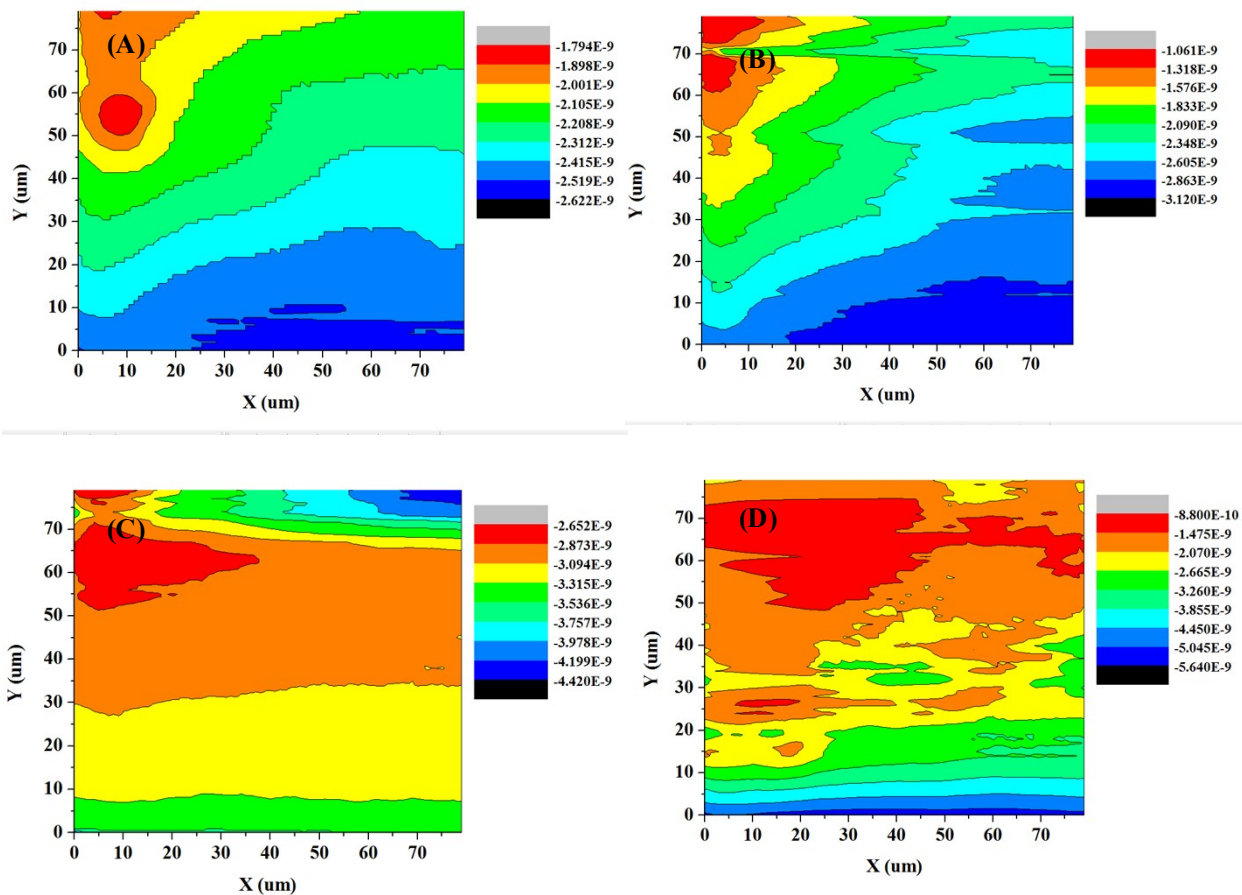

**Fig. S10.** Scanning electrochemical microscopy (SECM) imaging of photoanodes SBM3 at (A) 0.94V and (B) 1.14V and SBM5 at (C) 0.94V and (D) 1.14V substrate potential in 2mM  $[\text{Fe}(\text{CN})_6]^{3-}$  at constant height mode using Pt UME as probe and photoanodes as substrate.

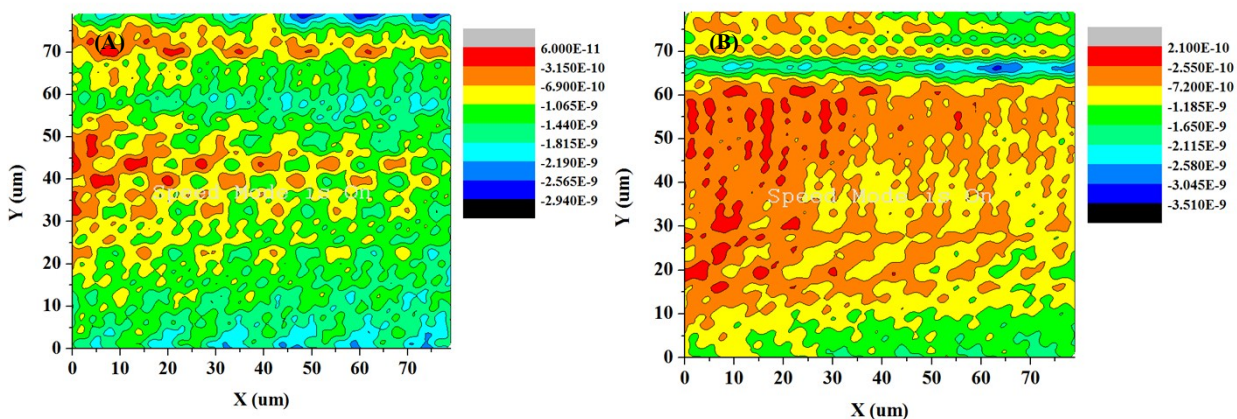

**Fig. S11.** Scanning electrochemical microscopy (SECM) imaging of photoanodes SBM7 at (A) 0.94V and (B) 1.14V substrate potential in 2mM  $[\text{Fe}(\text{CN})_6]^{3-}$  at constant height mode using Pt UME as probe and photoanodes as substrate.

## Reference

1. W. Luo, Z. Yang, Z. Li, J. Zhang, J. Liu, Z. Zhao, Z. Wang, S. Yan, T. Yu and Z. Zou, *Energy & Environmental Science*, 2011, **4**, 4046-4051.
2. S. Pilli, T. Furtak, L. Brown, T. Deutsch, J. Turner and A. Herring, *J. Am. Chem. Soc.*, 2011, **133**, 18370-18377.
3. F. F. Abdi, L. Han, A. H. Smets, M. Zeman, B. Dam and R. Van De Krol, *Nature communications*, 2013, **4**, 2195.
4. T. W. Kim and K.-S. Choi, *Science*, 2014, **343**, 990-994.
5. Y. Park, D. Kang and K.-S. Choi, *Physical Chemistry Chemical Physics*, 2014, **16**, 1238-1246.
6. J. H. Kim, Y. Jo, J. H. Kim, J. W. Jang, H. J. Kang, Y. H. Lee, D. S. Kim, Y. Jun and J. S. Lee, *ACS nano*, 2015, **9**, 11820-11829.

7. T. W. Kim, Y. Ping, G. A. Galli and K.-S. Choi, *Nature communications*, 2015, **6**, 8769.
8. M. Zhong, T. Hisatomi, Y. Kuang, J. Zhao, M. Liu, A. Iwase, Q. Jia, H. Nishiyama, T. Minegishi and M. Nakabayashi, *Journal of the American Chemical Society*, 2015, **137**, 5053-5060.
9. M. Rohloff, B. Anke, S. Zhang, U. Gernert, C. Scheu, M. Lerch and A. Fischer, *Sustainable Energy & Fuels*, 2017, **1**, 1830-1846.
10. J.-S. Yang and J.-J. Wu, *Nano Energy*, 2017, **32**, 232-240.
11. M. Huang, J. Bian, W. Xiong, C. Huang and R. Zhang, *Journal of Materials Chemistry A*, 2018, **6**, 3602-3609.
12. S. Byun, G. Jung, S.-Y. Moon, B. Kim, J. Y. Park, S. Jeon, S.-W. Nam and B. Shin, *Nano energy*, 2018, **43**, 244-252.
13. M. Rohloff, B. r. Anke, O. Kasian, S. Zhang, M. Lerch, C. Scheu and A. Fischer, *ACS applied materials & interfaces*, 2019.
14. X. Cao, C. Xu, X. Liang, J. Ma, M. Yue and Y. Ding, *Applied Catalysis B: Environmental*, 2020, **260**, 118136.
15. R. Cornut and C. Lefrou, *Journal of Electroanalytical Chemistry*, 2008, **621**, 178-184.
16. B. Zhang, X. Zhang, X. Xiao and Y. Shen, *ACS applied materials & interfaces*, 2016, **8**, 1606-1614.
17. U. Mengesha Tefashe, K. Nonomura, N. Vlachopoulos, A. Hagfeldt and G. Wittstock, *The Journal of Physical Chemistry C*, 2012, **116**, 4316-4323.
18. C. Wei, A. J. Bard and M. V. Mirkin, *The Journal of Physical Chemistry*, 1995, **99**, 16033-16042.
19. C. Lefrou and R. Cornut, *ChemPhysChem*, 2010, **11**, 547-556.
